# Supplementary material for: Template-Free Synthesis of Monoclinic BiVO4 with Porous Structure and Its High Photocatalytic Activity
Source: MDPI journal article supplement (doi:10.3390/ma9080685), 2016-08-11
Supplement: s1 [file s1]

# Supplementary Materials: Template-Free Synthesis of Monoclinic $\text{BiVO}_4$ with Porous Structure and Its High Photocatalytic Activity

Pengyu Dong, Xinguo Xi, Xinjiang Zhang, Guihua Hou and Rongfeng Guan

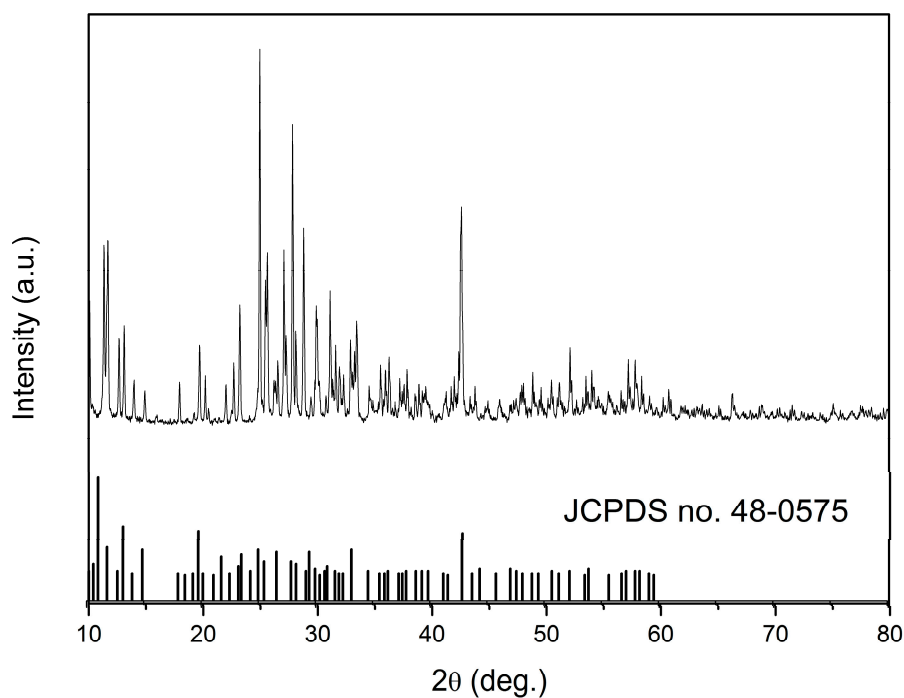

**Figure S1.** XRD pattern of the precursor.

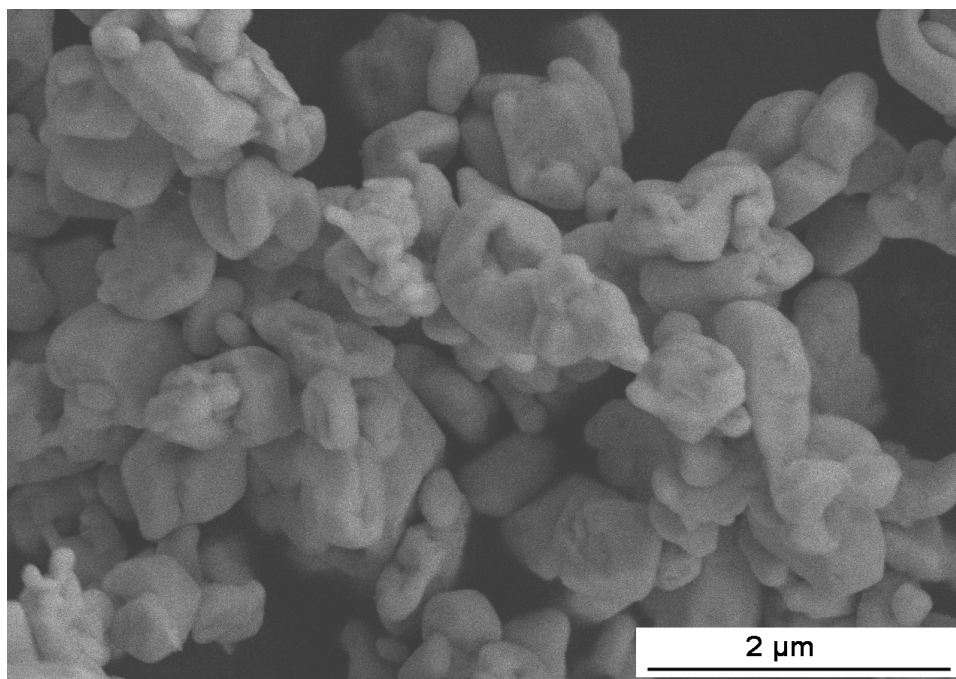

**Figure S2.** Low magnification SEM image of as-obtained  $\text{BiVO}_4$  products prepared at the hydrothermal temperatures of 180 °C.

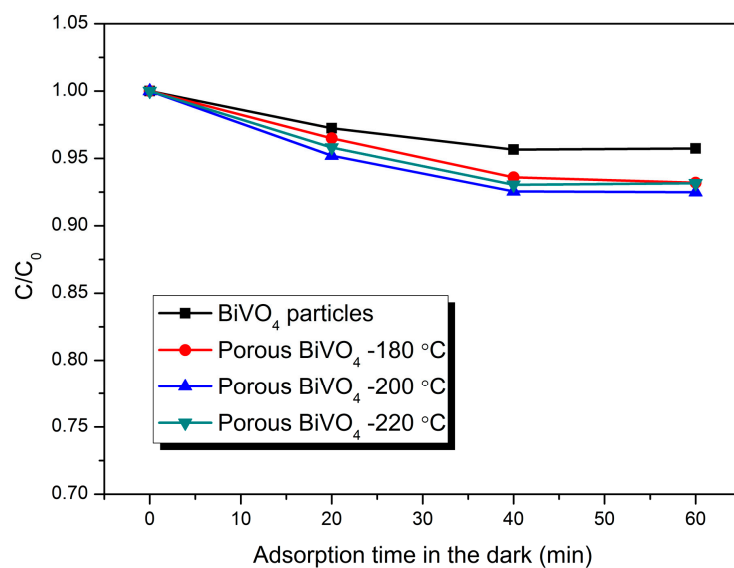

**Figure S3.** The adsorption isotherms of MB in the presence of as-prepared samples under dark conditions.

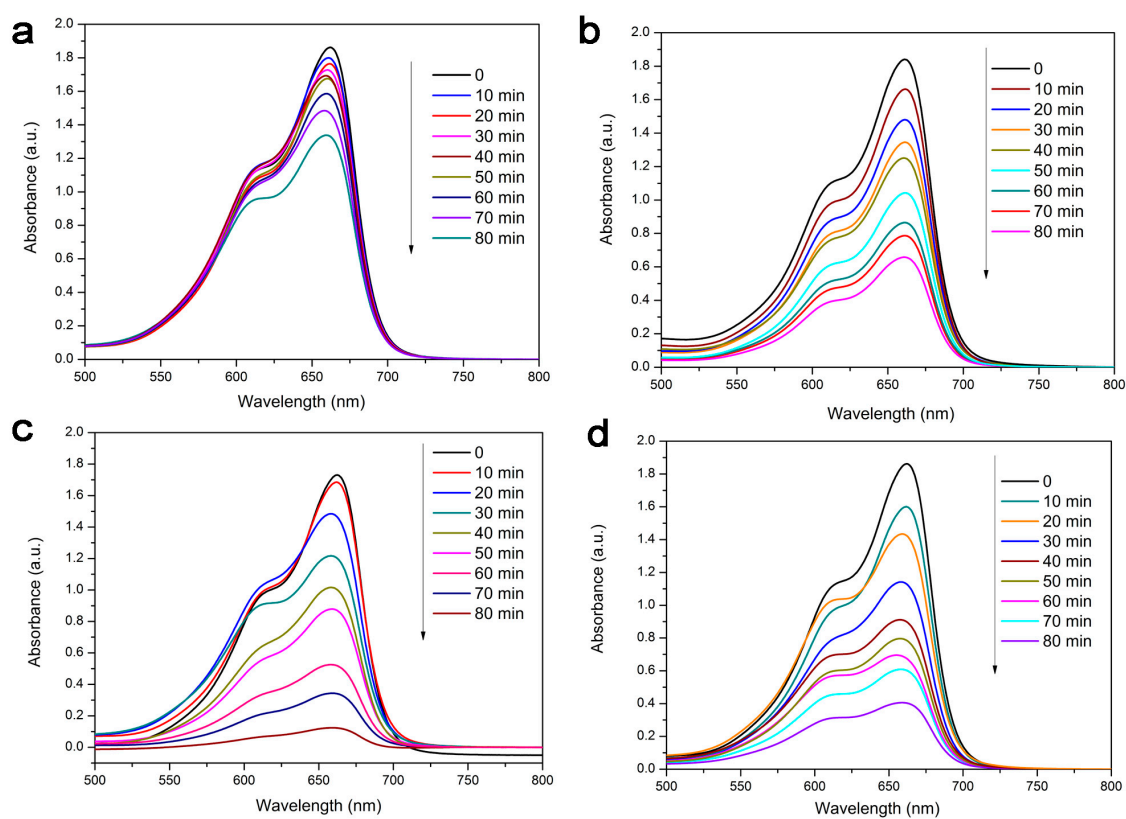

**Figure S4.** UV-vis absorption spectra of MB solutions separated from the photocatalysts of BiVO<sub>4</sub> particles (a); and as-obtained BiVO<sub>4</sub> products prepared at the hydrothermal temperatures of 180 °C (b); 200 °C (c); and 220 °C (d) suspensions during illumination.
